# Supplementary material for: An outstanding second-harmonic generation material BiB2O4F: exploiting the electron-withdrawing ability of fluorine
Source: Royal Society of Chemistry journal article supplement (doi:10.1039/c4qi00192c), 2014-12-26
Supplement: c4qi00192c1.pdf [file c4qi00192c1.pdf]

Electronic Supplementary Information for

An outstanding Second-Harmonic Generation Material  $\text{BiB}_2\text{O}_4\text{F}$ :  
Exploiting the Electron-withdrawing Ability of Fluorine

*Rihong Cong,<sup>a\*</sup> Ying Wang,<sup>a</sup> Lei Kang,<sup>b,c</sup> Zhengyang Zhou,<sup>a</sup> Zheshuai Lin,<sup>b\*</sup> Tao  
Yang,<sup>a\*</sup>*

<sup>a</sup> College of Chemistry and Chemical Engineering, Chongqing University, Chongqing  
400044, People's Republic of China

<sup>b</sup> Beijing Center for Crystal R&D, Key Lab of Functional Crystals and Laser  
Technology, Technical Institute of Physics and Chemistry, Chinese Academy of  
Science, P.O. Box 2711, Beijing 100080, People's Republic of China

<sup>c</sup> University of Chinese Academy of Sciences, Beijing 100049, PR China

\*Correspondence authors, email: [congrihong@cqu.edu.cn](mailto:congrihong@cqu.edu.cn), [zslin@mail.ipc.ac.cn](mailto:zslin@mail.ipc.ac.cn) and  
[taoyang@cqu.edu.cn](mailto:taoyang@cqu.edu.cn); Tel: (86 23)65105065; Fax: (86 23)65105065.

## Computational method

The electronic structure and SHG coefficients for  $\text{BiB}_2\text{O}_4\text{F}$  and  $\text{BiB}_2\text{O}_4(\text{OH})$  were calculated using the first-principles plane-wave pseudopotential method implemented in the CASTEP program.<sup>1,2</sup> The local density approximation (LDA) is adopted to describe the exchange-correlation (XC) functionals.<sup>3</sup> The ion-electron interactions are modeled by the optimized norm-conserving pseudopotentials of the Kleinman-Bylander form for all constituent elements.<sup>4,5</sup> In this model, Bi  $5d^{10}6s^26p^3$ , B  $2s^22p^1$ , O  $2s^22p^4$ , and F  $2s^22p^5$  electrons are treated as the valence electrons, respectively. A kinetic energy cutoff of 900 eV and Monkhorst-Pack  $k$ -point meshes<sup>6</sup> spanning less than  $0.04/\text{\AA}^3$  in the Brillouin zone were chosen to ensure the present purposes to be sufficiently accurate. It is known that the position of hydrogen atoms cannot be determined accurately by experiments, but these approximate locations provide the initial structures for the further theoretical optimization. The geometries are optimized by the Broyden, Fletcher, Goldfarb, and Shannon minimizer.<sup>7</sup> The convergence thresholds between optimization cycles for energy change, maximum force, maximum stress, and maximum displacement are set as  $5 \times 10^{-5}$  eV/atom, 0.01 eV/ $\text{\AA}$ , 0.02 GPa, and 0.0005  $\text{\AA}$ , respectively. The optimization terminates when all of these criteria are satisfied.

Based on the calculated electronic structures, the linear optical refractive indices and the SHG coefficients of  $\text{BiB}_2\text{O}_4\text{F}$  and  $\text{BiB}_2\text{O}_4(\text{OH})$  were determined. The refractive indices were calculated through the Kromer-Kronig transformation from the

imaginary part of the dielectric function, which can be obtained with the matrix elements that describe the electronic transitions between the ground and excited states in the crystal considered. Since the energy band gap of  $\text{BiB}_2\text{O}_4\text{F}$  and  $\text{BiB}_2\text{O}_4(\text{OH})$  are much larger than the frequency of incident light (i.e. at the wavelength of 1064 nm), the dispersion of the SHG effects is neglectable, so the static limit of SHG coefficients is accurate enough to characterize their non-resonant NLO properties. The static SHG coefficients were calculated by the formula developed by Lin et al.,<sup>8,9</sup> and further the microscopic structural origins are investigated by the real-space atom-cutting technique.<sup>9</sup> The same computational and analysis methodology has been implemented in the CASTEP academic code and successfully applied on various NLO crystals, such as LBO-family,<sup>10</sup> KDP<sup>11</sup> and BIBO.<sup>12</sup> It is well known that the band-gap calculated by LDA is usually smaller than the experimental data due to the discontinuity of exchange-correlation energy. Thus, a scissors operator is used to shift upward all the conduction bands (CB) in order to agree with measured values of the band-gap.<sup>13</sup>

## Reference

- (1) Payne, M. C.; Teter, M. P.; Allan, D. C.; Arias, T. A.; Joannopoulos, J. D. *Rev. Mod. Phys.*, 1992, **64**, 1045-1097.
- (2) Clark, S. J.; Segall, M. D.; Pickard, C. J.; Hasnip, P. J.; Probert, M. J.; Refson, K.; Payne, M. C. *Zeitschrift Fur Kristallographie*, 2005, **220**, 567-570.
- (3) Ceperley, D. M.; Alder, B. J. *Phys. Rev. Lett.*, 1980, **45**, 566-569.
- (4) Lin, J. S.; Qteish, A.; Payne, M. C.; Heine, V. *Phys. Rev. B*, 1993, **47**, 4174-4180.

- (5) Kleinman, L.; Bylander, D. M. *Phys. Rev. Lett.*, 1982, **48**, 1425-1428.
- (6) Monkhorst, H. J.; Pack, J. D. *Phys. Rev. B*, 1976, **13**, 5188-5192.
- (7) Pfrommer, B. G.; Cote, M.; Louie, S. G.; Cohen, M. L. *J. Comput. Phys.* 1997, **131**, 133-140.
- (8) Lin, Z. S.; Lin, J.; Wang, Z. Z.; Wu, Y. C.; Ye, N.; Chen, C. T.; Li, R. K. *Phys. Rev. B: Condens. Matter Mater. Phys.* 2001, **13**, R369-R384.
- (9) Lin, J.; Lee, M. H.; Liu, Z. P.; Chen, C. T.; Pickard, C. J. *Phys. Rev. B: Condens. Matter* 1990, **60**, 13380-13389.
- (10) Lin, Z. S.; Lin, J.; Wang, Z. Z.; Chen, C. T.; Lee, M. H. *Phys. Rev. B: Condens. Matter* 2000, **62**, 1757-1764.
- (11) Lin, Z. S.; Wang, Z. Z.; Chen, C. T. *J. Chem. Phys.* 2003, **118**, 2349-2356.
- (12) Lin, Z. S.; Wang, Z. Z.; Chen, C. T.; Lee, M. H. *J. Appl. Phys.* 2001, **90**, 5585-5590.
- (13) Godby, R. W.; Schluter, M.; Sham, L. J. *Phys. Rev. B* 1998, **37**, 10159-10175.

Table S1. X-ray data collection conditions, crystallographic and structure refinement parameters for BiB<sub>2</sub>O<sub>4</sub>(OH).

| Chemical formula                                    | BiB <sub>2</sub> O <sub>4</sub> (OH)                              |
|-----------------------------------------------------|-------------------------------------------------------------------|
| Deposition number                                   | CCDC1014612                                                       |
| Space group (number)                                | <i>P</i> 3 <sub>1</sub> (144)                                     |
| Lattice parameters (Å)                              | <i>a</i> = 6.62214(10), <i>c</i> = 6.65264(10)                    |
| <i>V</i> (Å <sup>3</sup> )                          | 252.652(8)                                                        |
| <i>Z</i>                                            | 3                                                                 |
| <i>D</i> <sub>x</sub> (g·cm <sup>-3</sup> )         | 6.144                                                             |
| Radiation type, <i>λ</i> (Å)                        | Mo <i>Kα</i> <sub>1</sub> , 0.71073                               |
| Specimen form, color and size (mm)                  | Block, colorless, 0.05 × 0.05 × 0.05                              |
| Diffractometer                                      | SuperNova equipped with Eos                                       |
| Temperature (K)                                     | 104                                                               |
| <i>F</i> <sub>000</sub>                             | 402                                                               |
| <i>μ</i> (Mo <i>Kα</i> ) (mm <sup>-1</sup> )        | 52.218                                                            |
| <i>θ</i> range (deg)                                | 3.553-28.995                                                      |
| Number of reflections                               | 448                                                               |
| Number of refined parameters                        | 35                                                                |
| Number of restraints                                | 1                                                                 |
| Structure determination                             | Direct method                                                     |
| Structure refinement                                | Shelx97                                                           |
| <i>R</i> <sub>int</sub>                             | 0.0276                                                            |
| Final <i>R</i> indices [ <i>I</i> > 2σ( <i>I</i> )] | <i>R</i> <sub>1</sub> = 0.0418<br><i>wR</i> <sub>2</sub> = 0.0915 |
| <i>R</i> indices (all data)                         | <i>R</i> <sub>1</sub> = 0.0443<br><i>wR</i> <sub>2</sub> = 0.0934 |

GOF

1.018

Table S2. Fractional atomic coordinates, isotropic thermal displacement factors and BVS (Bond Valence Sum) values for BiB<sub>2</sub>O<sub>4</sub>(OH).

| Atom | <i>x</i>  | <i>y</i>  | <i>z</i>   | <i>U</i> <sub>eq</sub> /Å <sup>2</sup> | BVS  |
|------|-----------|-----------|------------|----------------------------------------|------|
| Bi   | 0.4654(2) | 1.0395(2) | -0.5020(8) | 0.0018(3)                              | 2.87 |
| O1   | 0.652(4)  | 0.811(4)  | -0.472(4)  | 0.004(3)                               | 2.09 |
| O2   | 0.342(4)  | 0.148(4)  | -0.895(3)  | 0.004(3)                               | 2.13 |
| O3   | 0.589(4)  | 1.433(4)  | -0.529(3)  | 0.004(3)                               | 2.03 |
| O4   | 1.076(4)  | 1.038(4)  | -0.389(3)  | 0.004(3)                               | 1.58 |
| O5   | 0.384(4)  | 0.490(4)  | -0.260(3)  | 0.000(5)                               | 0.98 |
| B1   | 0.882(9)  | 0.989(9)  | -0.531(7)  | 0.022(11)                              | 2.95 |
| B2   | 0.609(7)  | 0.603(6)  | -0.363(5)  | 0.001(7)                               | 2.99 |
| H    | 0.2045    | 0.6152    | 0.5183     |                                        |      |

Table S3. Selected bond distances (Å) for BiB<sub>2</sub>O<sub>4</sub>(OH).

| Atom-atom | bond lengths (Å) | Atom-atom | bond lengths (Å) |
|-----------|------------------|-----------|------------------|
| Bi-O1     | 2.39(2)          | B1-O1     | 1.44(6)          |
| Bi-O2     | 2.27(2)          | B1-O2     | 1.48(6)          |
| Bi-O3     | 2.31(2)          | B1-O4     | 1.50(6)          |
| Bi-O3     | 2.16(2)          | B1-O4     | 1.52(5)          |
| Bi-O4     | 2.68(2)          | B2-O1     | 1.45(4)          |
| Bi-O5     | 2.69(2)          | B2-O2     | 1.47(4)          |
|           |                  | B2-O3     | 1.54(4)          |

|  |  |       |         |
|--|--|-------|---------|
|  |  | B2-O5 | 1.46(4) |
|--|--|-------|---------|

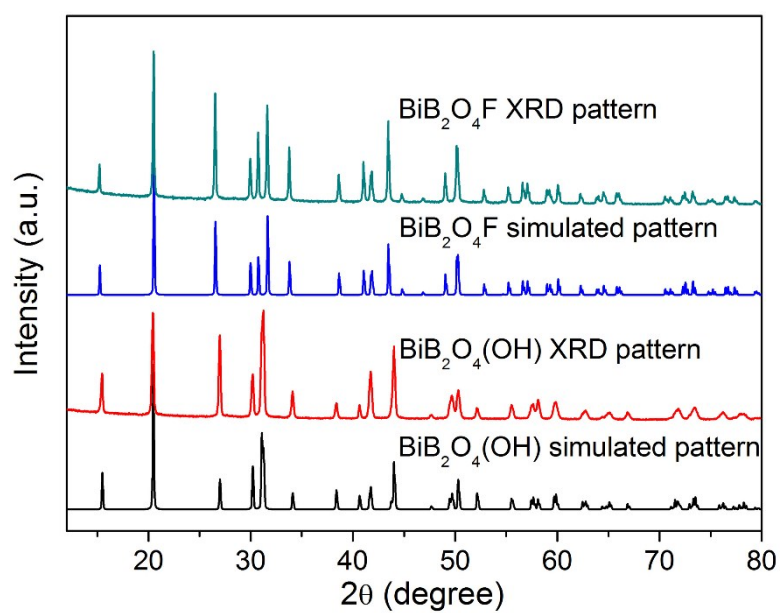

Fig. S1. Typical powder XRD patterns for BiB<sub>2</sub>O<sub>4</sub>(OH) and BiB<sub>2</sub>O<sub>4</sub>F, where the simulated patterns based on their crystal structures are also presented for comparison.

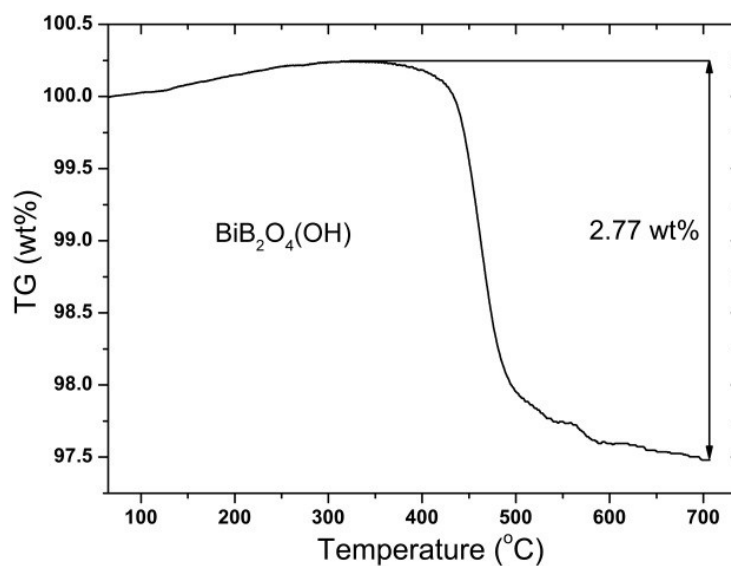

Fig. S2. TG curve of as-synthesized BiB<sub>2</sub>O<sub>4</sub>(OH).

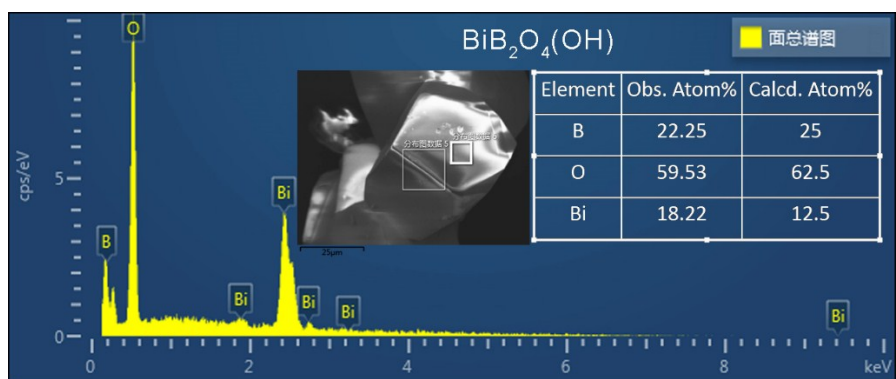

Fig. S3. SEM and EDX on a selected  $\text{BiB}_2\text{O}_4(\text{OH})$  crystal. The observed atomic ratio is close to the expected formula, expect that the Bi content is slightly high. Considering the large experimental error for SEM/EDX on heavy atoms, this deviation is acceptable. In fact, in the previous report (L. Y. Li, G. B. Li, Y. X. Wang, F. H. Liao, J. H. Lin, *Chem. Mater.*, 2005, 17, 4174-4180), the authors has performed an elemental analysis by inductively coupled plasma-atomic emission spectrometry (ICP-AES) on both  $\text{BiB}_2\text{O}_4\text{F}$  and  $\text{BiB}_2\text{O}_4(\text{OH})$ , where the obtained B:Bi mole ratios were 1.93 and 2.06, respectively.
